# Supplementary material
Source: PubMed Central journal article supplement (PMC5853408)
Supplement: jix514_suppl_supp_figure_1.pdf [file jix514_suppl_supp_figure_1.pdf]

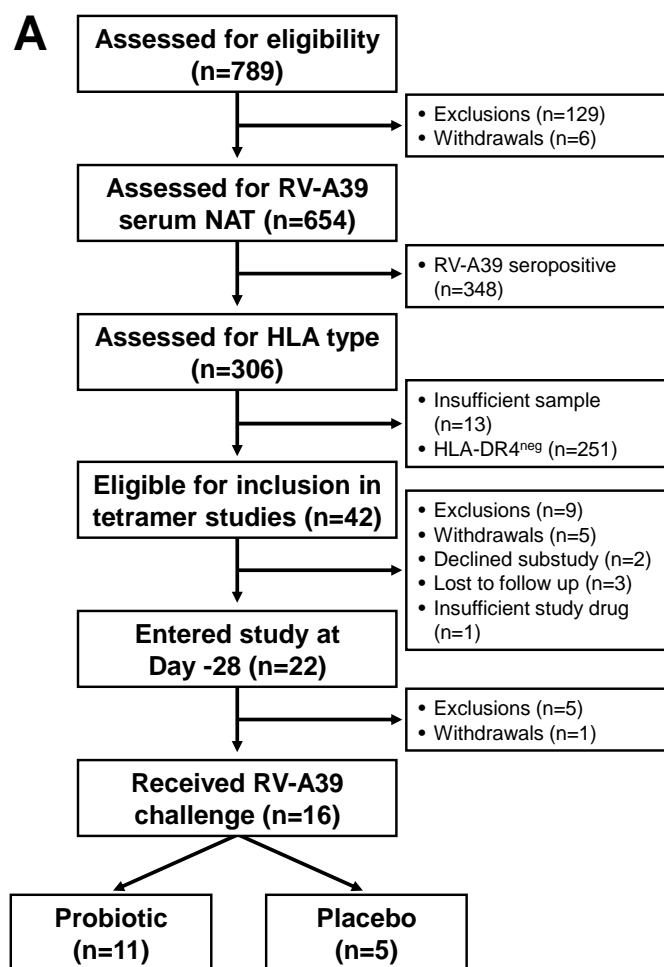

**B**

| HLA-DR4+<br>Subjects (n=16) |             |
|-----------------------------|-------------|
| Gender [n (%)]              |             |
| Male                        | 4 (25%)     |
| Female                      | 12 (75%)    |
| Race [n (%)]                |             |
| White                       | 15 (94%)    |
| Other                       | 1 (6%)      |
| Ethnicity [n (%)]           |             |
| Hispanic                    | 1 (6%)      |
| Non-Hispanic                | 14 (88%)    |
| Unknown                     | 1 (6%)      |
| Age [yrs, mean (SD)]        | 21.25 (3.7) |

**Supplementary Figure 1. Study Subjects and Enrollment.** (A) Consort diagram showing identification of a subgroup of HLA-DR4+ subjects who tested seronegative for RV-A39 and completed a double-blind placebo-controlled trial of probiotic supplementation for common cold. (B) Characteristics of HLA-DR4+ subjects.
