# Supplementary material
Source: PubMed Central journal article supplement (PMC5853408)
Supplement: jix514_suppl_supp_figure_2.pdf [file jix514_suppl_supp_figure_2.pdf]

**A**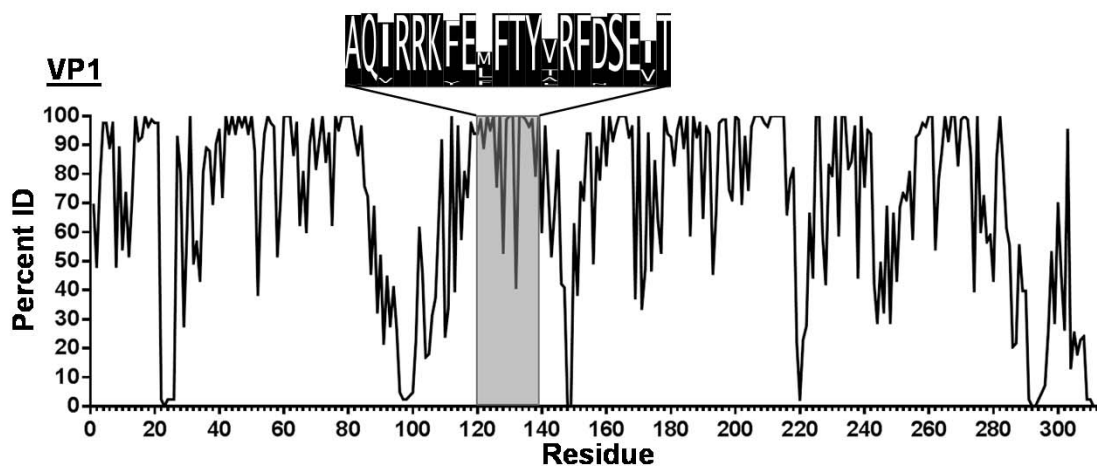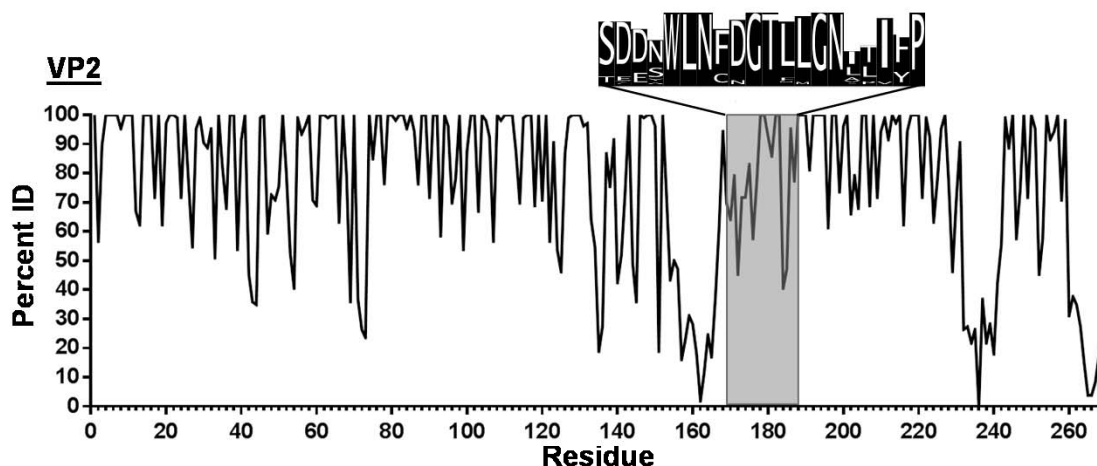**B**

| Epitope                                                                                                                                                                                                                                    | Prevalence of Amino Acid Sequence Identity Among Strains of Each Rhinovirus Species |                  |                  |                  |                  |                  |                       |                  |                       |
|--------------------------------------------------------------------------------------------------------------------------------------------------------------------------------------------------------------------------------------------|-------------------------------------------------------------------------------------|------------------|------------------|------------------|------------------|------------------|-----------------------|------------------|-----------------------|
|                                                                                                                                                                                                                                            | ----- RV A -----                                                                    |                  |                  |                  |                  | ----- RV B ----- |                       | ----- RV C ----- |                       |
|                                                                                                                                                                                                                                            | 100%                                                                                | 99-95%           | 94-90%           | 89-85%           | Total            | Total            | Range<br>(% identity) | Total            | Range<br>(% identity) |
| VP1 <sub>P14</sub> <u>AQVRRK</u> FEM <sup>M</sup> F <sup>F</sup> TY <sup>Y</sup> VR <sup>R</sup> FDSE <sup>E</sup> IT <sup>T</sup>                                                                                                         | 1/77<br>(1.3%)                                                                      | 10/77<br>(13.0%) | 24/77<br>(31.2%) | 27/77<br>(35.1%) | 62/77<br>(80.5%) | 8/29<br>(27.6%)  | 80-75%                | 5/51<br>(9.8%)   | 90-80%                |
| VP2 <sub>P60</sub> SDD <sup>D</sup> N <sup>N</sup> W <sup>W</sup> L <sup>L</sup> N <sup>N</sup> F <sup>F</sup> D <sup>D</sup> G <sup>G</sup> T <sup>T</sup> LL <sup>L</sup> GN <sup>N</sup> LL <sup>L</sup> IF <sup>F</sup> P <sup>P</sup> | 5/77<br>(6.5%)                                                                      | 13/77<br>(16.9%) | 20/77<br>(26.0%) | 17/77<br>(22.1%) | 55/77<br>(71.4%) | 24/29<br>(82.8%) | 70-50%                | 6/51<br>(11.8%)  | 60-50%                |

**Supplementary Figure 2. Peptide Epitopes of RV-A39 Displayed on HLA-DR4 Tetramers.** Two epitopes were identified by tetramer-guided epitope mapping of RV-A39 capsid proteins VP1 and VP2 in the context of HLA-DRB1\*0401. **(A)** Location of RV-A39 peptides within VP1 and VP2. Amino acid sequence identity for RV-A, -B, and -C strains and consensus sequences are depicted. **(B)** Sequence similarity between RV-A39 epitopes and RV-A, -B, and -C species. Values denote the prevalence of strains within each RV species sharing amino acid identity with RV-A39 epitopes, with percentages in parentheses. For RV-B and -C species, only the total prevalence within the top 5,000 hits with a corresponding range of amino acid identities are shown. Underlines denote the predicted minimal MHCII binding cores for each peptide epitope.
