# Supplementary material
Source: PubMed Central journal article supplement (PMC5853408)
Supplement: jix514_suppl_supp_figure_3.pdf [file jix514_suppl_supp_figure_3.pdf]

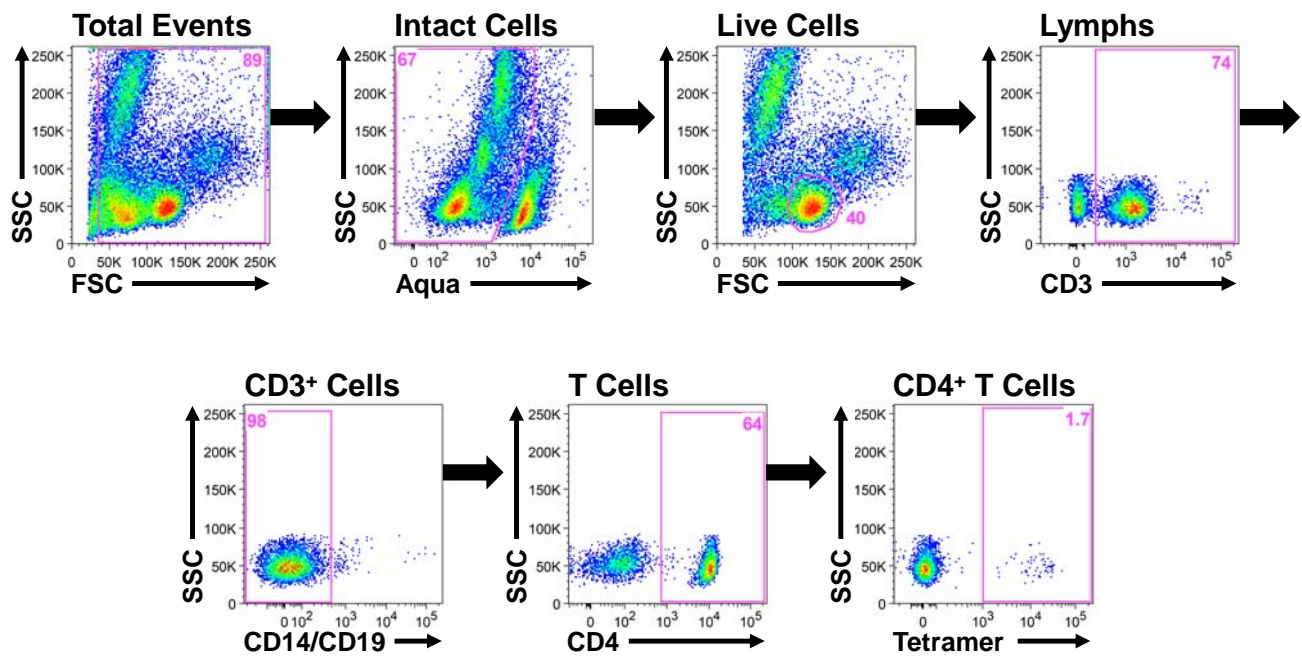

**Supplementary Figure 3. Gating Strategy for the Identification of Tetramer<sup>+</sup> CD4<sup>+</sup> T Cells.** PBMCs were enriched for tetramer<sup>+</sup> T cells using an anti-PE column. The enriched fraction was then analyzed by flow cytometry.
