# Supplementary material
Source: PubMed Central journal article supplement (PMC5853408)
Supplement: jix514_suppl_supp_figure_4.pdf [file jix514_suppl_supp_figure_4.pdf]

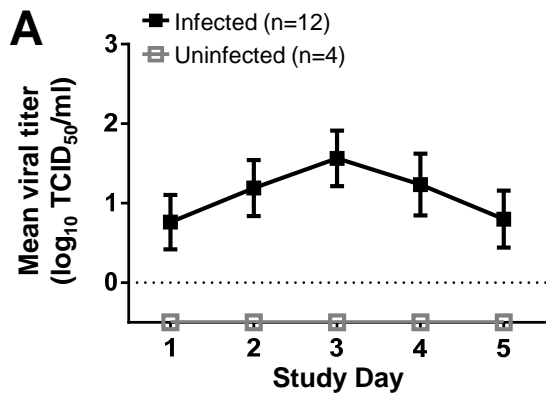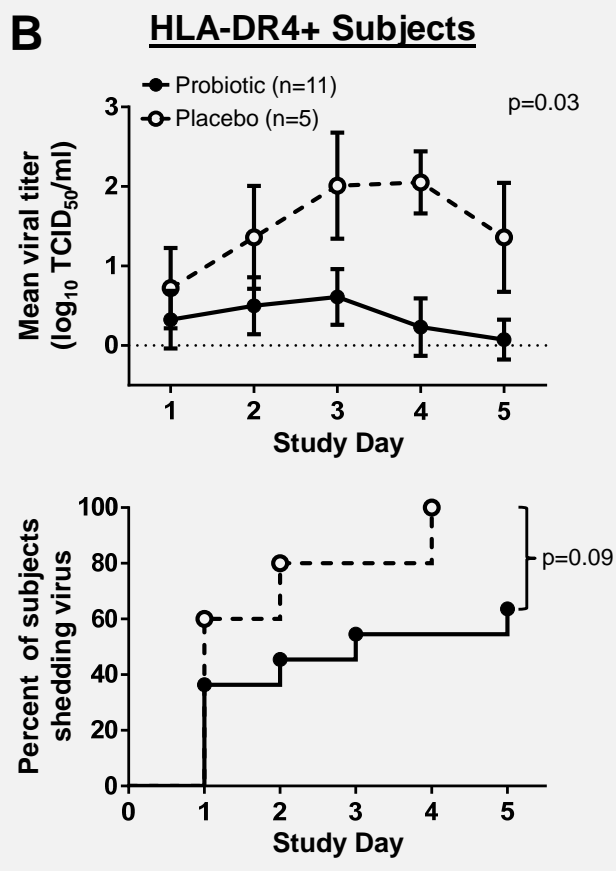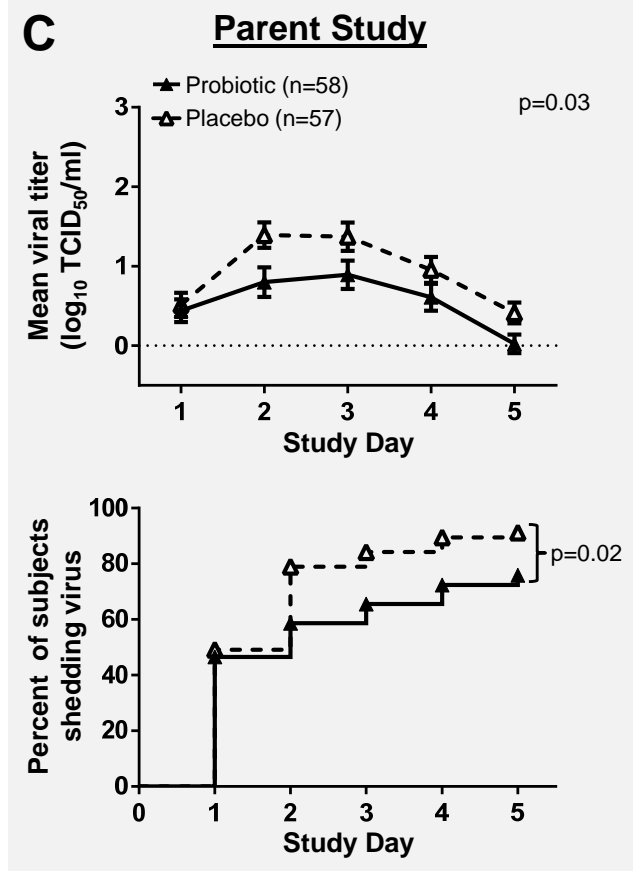

**Supplementary Figure 4. Viral Titers and Time to Viral Shedding in Nasal Lavage Specimens in Relation to Infection Status and Study Group.** (A) Viral titers in subjects inoculated with RV-A39 based on infection status. (B) Viral titer and time to viral shedding in probiotic and placebo groups for HLA-DR4+ subjects. (C) Viral titer and time to viral shedding in probiotic and placebo groups for the parent study. Adapted from [S1] with permission. Bars denote mean  $\pm$  SEM.
