# Supplementary material
Source: PubMed Central journal article supplement (PMC5853408)
Supplement: jix514_suppl_supp_figure_5.pdf [file jix514_suppl_supp_figure_5.pdf]

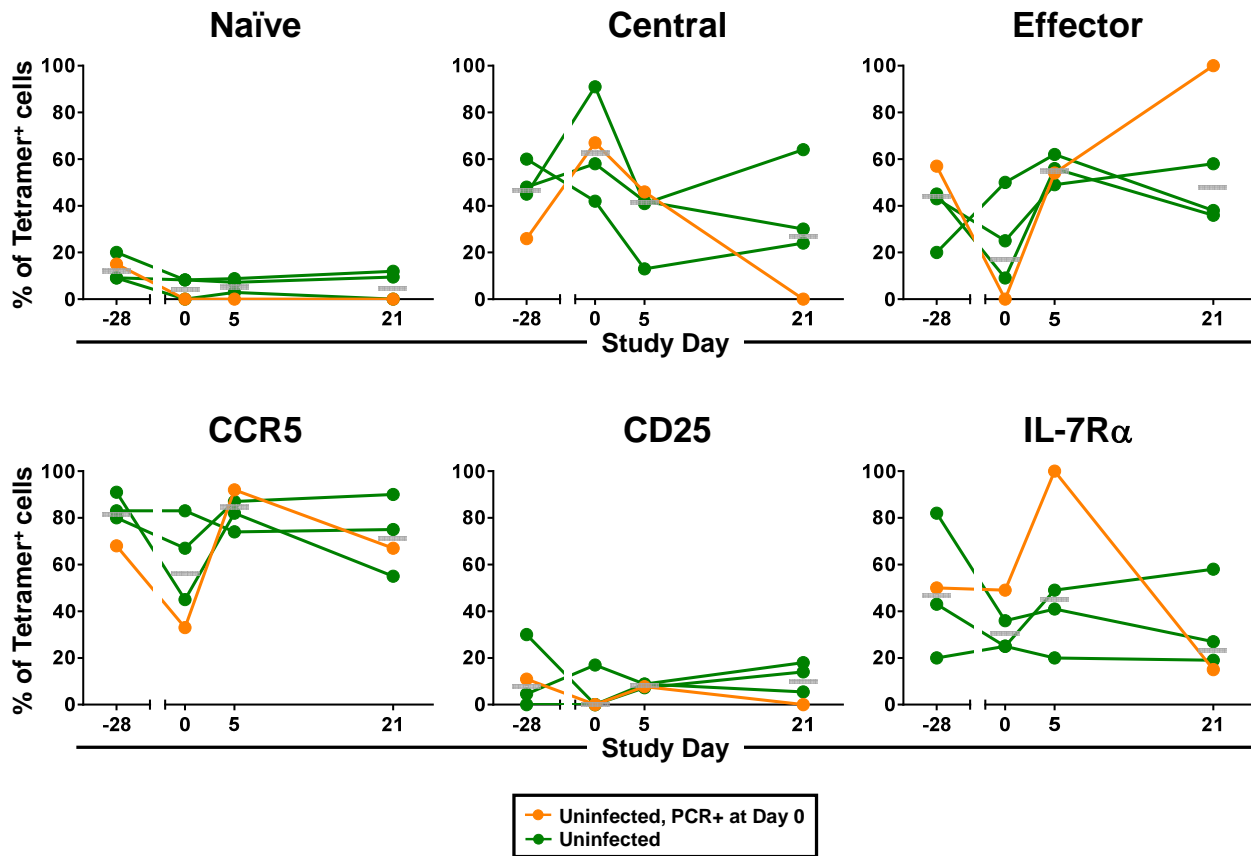

**Supplementary Figure 5. Phenotypic Transitions of Tetramer+ T Cells in Uninfected Subjects After RV Challenge.** Percentage of tetramer+ T cells displaying memory signatures and expressing CCR5, CD25 and IL-7R $\alpha$  in 4 uninfected subjects. Bars denote medians.
