# Supplementary material
Source: PubMed Central journal article supplement (PMC5853408)
Supplement: jix514_suppl_supp_figure_7.pdf [file jix514_suppl_supp_figure_7.pdf]

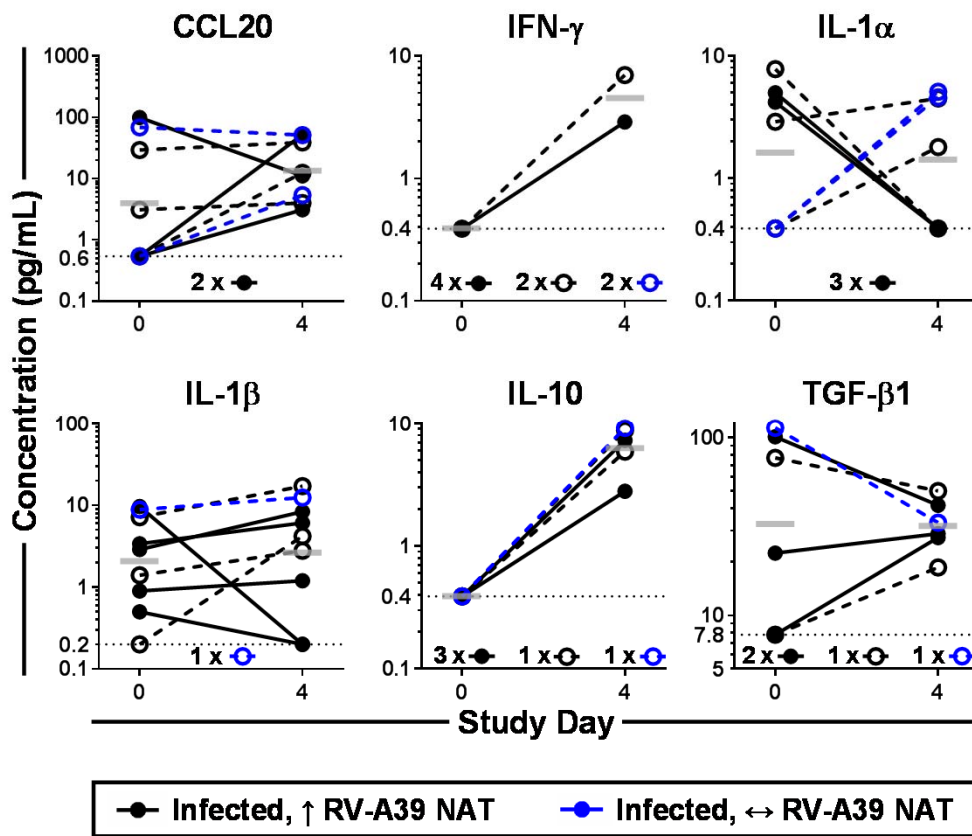

**Supplementary Figure 7. Cytokine Levels in Nasal Lavage Specimens.** Cytokine levels immediately before RV challenge and 4 days post-challenge in infected subjects who had no evidence of RV-A39 exposure prior to challenge (n=10). Dashed lines denote subjects who received placebo. Bars denote medians. Symbols below the limit of detection (horizontal dotted line) denote samples with undetectable levels. Changes did not reach statistical significance. The following cytokines were not detected in any subjects: GM-CSF, IL-12p70, IL-15, TNF $\alpha$ .
